# Supplementary material for: Long-Time Interval Satellite Image Analysis on Forest-Cover Changes and Disturbances around Protected Area, Zeya State Nature Reserve, in the Russian Far East
Source: MDPI journal article supplement (doi:10.3390/rs13071285), 2021-03-27
Supplement: s1 [file s1]

Supplementary Materials for

**Long-time Interval Satellite Image Analysis on Forest Cover Changes and Disturbances around Protected Area, Zeya State Nature Reserve, in the Russian Far East**

Chulabush Khatancharoen<sup>1\*</sup>, Satoshi Tsuyuki<sup>1</sup>, Semyon V. Bryanin<sup>2</sup>, Konosuke Sugiura<sup>3</sup>, Tatsuyuki Seino<sup>4</sup>, Viktor V. Lisovsky<sup>5</sup> Irina G. Borisova<sup>6</sup>, and Naoya Wada<sup>3</sup>

\*Correspondence: [chulabush04@gmail.com](mailto:chulabush04@gmail.com)

**Table S1** Major Forest Types of Zeya State Nature Reserve

| Major Forest Types                                               | Description (Elevation)                                                                                                                                                                                                        |
|------------------------------------------------------------------|--------------------------------------------------------------------------------------------------------------------------------------------------------------------------------------------------------------------------------|
| Mountain tundra vegetation with fragments of dwarf pine woodland | Shrub, sedge, lichen, moss (1200-1442.8 m asl)                                                                                                                                                                                 |
| Dwarf pine woodland                                              | The communities of <i>Pinus pumila</i> (Pall.) Regel are wild rosemary, green moss, dead cover (1100-1400 m asl)                                                                                                               |
| Mountain spruce forests                                          | The communities of <i>Picea ajanensis</i> (Lindl. et Gord.) Fisch. Ex Carrière and <i>Betula lanata</i> (Regel) V.N. Vassil. reed grass and grass-green moss. Forbs reed meadows (1100-1300 m asl)                             |
| Spruce forests in a river valley                                 | <i>Picea ajanensis</i> (Lindl. et Gord.) Fisch. ex Carr. (900-1300 m asl)                                                                                                                                                      |
| Larch and Birch forests                                          | <i>Larix gmelinii</i> (Rupr.) Kuzen, <i>Betula platyphylla</i> Sukacz. (315-1000 m asl)                                                                                                                                        |
| Mixed forests in a river valley                                  | <i>Larix gmelinii</i> (Rupr.) Kuzen, <i>Vaccinium uliginosum</i> L., <i>Salix myrtilloides</i> L., <i>Chamaedaphne calyculata</i> (L.) Moench; muddy, wetland, willow, floodplain (below 700 m asl)                            |
| Oak - Daurian birch forests                                      | <i>Larix gmelinii</i> (Rupr.) Kuzen, <i>Picea ajanensis</i> (Lindl. et Gord.) Fisch. ex Carr., <i>Chosenia arbutifolia</i> (Pall.) DC., <i>Populus suaveolens</i> Fisch., <i>Swida alba</i> (L.) Opiz, grass (below 700 m asl) |

**Table S2** Data from survey plots at Zeya State Nature Reserve

| Plot name | Date (mm/dd/yyyy) | Latitude   | Longitude  | Elevation (m) | Slope direction | Slope angle (Degree) | Dominant species (#of trees)                                                       | Average DBH of dominant species (cm) | Average height of dominant species (m) | Forest Fire Disturbance Intensity |
|-----------|-------------------|------------|------------|---------------|-----------------|----------------------|------------------------------------------------------------------------------------|--------------------------------------|----------------------------------------|-----------------------------------|
| NR1       | 8/6/2016          | 54.1218440 | 126.932333 | 1,305.40      | 195             | 12                   | <i>Picea ajanensis</i> (18)                                                        | 21.1                                 | 11.2                                   | N/A                               |
| NR2       | 8/7/2016          | 54.1083570 | 126.932428 | 853.04        | 192             | 5.5                  | <i>Larix gmelinii</i> (13)                                                         | 17.5                                 | 14.8                                   | N/A                               |
| NR3       | 8/8/2016          | 54.0913000 | 126.882125 | 626.02        | 335             | 1                    | <i>Larix gmelini</i> (29), <i>Picea ajanensis</i> (22)                             | 8.7, 6.3                             | 9.4, 5.7                               | N/A                               |
| NR4       | 8/8/2016          | 54.0831370 | 126.874603 | 600.15        | 245             | 2                    | <i>Larix gmelinii</i> (11)                                                         | 19.3                                 | 18.5                                   | N/A                               |
| NR5       | 8/2/2017          | 54.1418611 | 126.758556 | 716.00        | 10.5            | 9.7                  | <i>Picea ajanensis</i> (8)                                                         | 25.94                                | 16.14                                  | N/A                               |
| NR6       | 8/3/2017          | 54.1479444 | 126.779139 | 1065.00       | 53              | 9.4                  | <i>Picea ajanensis</i> (26)                                                        | 14.18                                | 11.67                                  | N/A                               |
| NR7       | 8/3/2017          | 54.1473333 | 126.781278 | 1073.00       | 136             | 11.0                 | <i>Pinus pumila</i> (10), <i>Picea ajanensis</i> (4),<br><i>Larix gmelinii</i> (5) | 3.71, 4.00, 6.39                     | 2.68, 2.78, 4.83                       | N/A                               |
| NR8       | 8/4/2017          | 54.1315000 | 126.739833 | 622.00        | 112             | 4.1                  | <i>Betula platyphylla</i> (13)                                                     | 14.59                                | 16.54                                  | N/A                               |
| NR9       | 8/5/2017          | 54.0135833 | 127.039083 | 594.00        | 26              | 7.7                  | <i>Betula platyphylla</i> (5),<br><i>Larix gmelinii</i> (13)                       | 15.36, 11.71                         | 17.41, 14.34                           | N/A                               |
| NR10      | 8/7/2017          | 54.0135833 | 127.039083 | 569.00        | 78              | 8.4                  | <i>Betula platyphylla</i> (15)                                                     | 3.41                                 | 4.43                                   | High                              |
| NR11      | 8/8/2017          | 54.0080555 | 127.047361 | 509.00        | 116             | 3.2                  | <i>Betula platyphylla</i> (13),<br><i>Pajanensis</i> (38)                          | 13.93, 2.18                          | 12.38, 4.38                            | High                              |
| BZ1       | 8/10/2016         | 54.0119300 | 127.037063 | 555.61        | 198             | 34                   | <i>Betula platyphylla</i> (36)                                                     | 2.5                                  | 3.6                                    | High                              |
| BZ2       | 8/7/2017          | 53.8724722 | 127.109806 | 491.00        | 38              | 4.9                  | <i>Betula platyphylla</i> (23)                                                     | 4.57                                 | 6.74                                   | Medium                            |
| BZ3       | 8/1/2018          | 54.0578056 | 126.920083 | 545.91        | 135             | 1                    | <i>Larix gmelinii</i> (12)                                                         | 10                                   | 9.4                                    | Low                               |
| BZ4       | 8/2/2018          | 54.1035556 | 126.796111 | 561.05        | 207             | 2                    | <i>Betula platyphylla</i> (4)                                                      | 8.2                                  | 3.8                                    | Medium                            |
| BZ5       | 8/3/2018          | 54.1273056 | 126.704778 | 559.85        | 180             | 4                    | <i>Larix gmelinii</i> (7)                                                          | 12.5                                 | 11.6                                   | N/A                               |
| BZ6       | 8/5/2018          | 53.8680556 | 127.121556 | 458.19        | 165.5           | 4.4                  | <i>Larix gmelinii</i> (14)                                                         | 8.5                                  | 11.1                                   | N/A                               |
| ONR1      | 8/10/2016         | 53.8178850 | 127.150909 | 508.97        | 265             | 10.1                 | <i>Larix gmelinii</i> (4)                                                          | 17.3                                 | 16.1                                   | High                              |
| ONR2      | 8/5/2017          | 53.9668333 | 127.056333 | 455.00        | 0               | 0.0                  | <i>Larix gmelinii</i> (4)                                                          | 26.36                                | 16.67                                  | High                              |
| ONR3      | 8/7/2017          | 53.9180556 | 127.073889 | 498.00        | 0               | 0.0                  | <i>Betula platyphylla</i> (6),<br><i>Larix gmelinii</i> (16)                       | 10.39, 10.24                         | 12.67, 11.07                           | High                              |
| ONR4      | 8/8/2017          | 53.8365556 | 127.146806 | 451.00        | 1               | 8.0                  | <i>Betula platyphylla</i> (16)                                                     | 3.72                                 | 5.80                                   | High                              |
| ONR5      | 8/1/2018          | 53.9619722 | 127.045139 | 409.40        | 135             | 1                    | <i>Larix gmelinii</i> (6)                                                          | 22.5                                 | 16.5                                   | Medium                            |
| ONR6      | 8/5/2018          | 54.1512778 | 126.661583 | 503.61        | 304             | 3                    | <i>Larix gmelini</i> (7), <i>Picea ajanensis</i> (15)                              | 15.6, 5.4                            | 18.7, 6.2                              | Low                               |

**Table S3** Class cover area (km<sup>2</sup>) inside, buffer zone, and outside of the Reserve in 1988-1999, 1999-2010 and 2010-2016

| Class Name | 1988-1999 |          |          | 1999-2010 |          |          | 2010-2016 |          |          |
|------------|-----------|----------|----------|-----------|----------|----------|-----------|----------|----------|
|            | Inside    | Buffer   | Outside  | Inside    | Buffer   | Outside  | Inside    | Buffer   | Outside  |
| BURN       | 4.5468    | 0.2565   | 10.6101  | 53.9343   | 5.5899   | 77.3883  | 2.5308    | 0.8019   | 64.2762  |
| CCTA       | 0         | 0.3438   | 19.6704  | 0         | 0.8631   | 7.2702   | 0         | 0.0063   | 6.5871   |
| CCE        | 0.0405    | 1.062    | 3.1842   | 0.0081    | 0.7677   | 2.8305   | 0         | 1.341    | 8.1378   |
| MD         | 0         | 0.1188   | 2.997    | 0         | 0        | 10.1043  | 0         | 0.7884   | 48.9456  |
| VGR        | 12.6243   | 9.0414   | 84.2985  | 10.0431   | 7.9245   | 79.9902  | 6.8292    | 0.8667   | 37.7973  |
| GRASS      | 25.5249   | 6.4998   | 216.5724 | 6.4692    | 9.8541   | 299.871  | 3.6405    | 12.3417  | 324.9864 |
| MF         | 27.6849   | 13.536   | 183.4983 | 36.1269   | 29.8836  | 251.9901 | 21.0087   | 18.6777  | 169.5321 |
| OBF        | 6.6636    | 10.2654  | 53.5068  | 8.6436    | 7.0272   | 36.5031  | 14.031    | 8.4276   | 23.9886  |
| BLF        | 766.1223  | 190.4535 | 1710.271 | 729.8622  | 168.2964 | 1570.734 | 765.0216  | 189.0576 | 1644.802 |
| SFRV       | 17.9739   | 5.9688   | 48.1482  | 14.6304   | 2.7171   | 14.3802  | 40.0995   | 3.1482   | 22.3695  |
| MSF        | 88.6113   | 9.1035   | 33.4161  | 84.4155   | 7.2963   | 23.7906  | 95.0013   | 6.8472   | 24.4206  |
| DPW        | 20.4147   | 0.6993   | 0.0054   | 24.165    | 0.6903   | 0.0171   | 23.2344   | 0.3159   | 0.0297   |
| MTV        | 6.9417    | 0.1773   | 0.0063   | 6.7068    | 0.0297   | 0        | 8.1981    | 0        | 0        |
| TOWN       | 0         | 0.0702   | 5.1813   | 0         | 0.0135   | 2.9754   | 0.0081    | 0        | 4.581    |
| ROAD       | 2.2095    | 1.512    | 1.9152   | 0.9702    | 1.5588   | 1.6965   | 1.3338    | 1.8639   | 4.0815   |
| ROCK       | 3.0096    | 1.4625   | 37.0782  | 4.563     | 2.6334   | 22.5963  | 1.7559    | 1.0107   | 20.9691  |
| WATER      | 6.6753    | 51.156   | 56.781   | 8.505     | 56.3742  | 63.8595  | 6.3504    | 56.232   | 61.3656  |

**Table S4** Area changes in different vegetation classes during 1999-2010 compared to 1988-1999. Green color gradient indicates upgrading process of vegetation succession. Red color gradient indicates degrading process of vegetation succession.

|                                               | 1999-2010 Total Area (km <sup>2</sup> ) |         |        |        |        |         |         |         |         |         |         |         |         |        |        |        |         |         |
|-----------------------------------------------|-----------------------------------------|---------|--------|--------|--------|---------|---------|---------|---------|---------|---------|---------|---------|--------|--------|--------|---------|---------|
|                                               | CLASS                                   | BURN    | CCTA   | CCE    | MD     | VGR     | GRASS   | MF      | OBF     | BLF     | SFRV    | MSF     | DPW     | MTV    | TOWN   | ROAD   | ROCK    | WATER   |
| 1988-1999<br>Total Area<br>(km <sup>2</sup> ) | BURN                                    | 0.1062  | 0      | 0.018  | 0.2511 | 2.3697  | 1.287   | 2.2455  | 0.0099  | 6.5349  | 0.0855  | 0.108   | 0       | 0      | 0      | 0.0009 | 0.117   | 0.2637  |
|                                               | CCTA                                    | 0.8541  | 0.0243 | 0.0585 | 0.549  | 4.9005  | 2.4156  | 2.7657  | 0.1035  | 8.1018  | 0.0009  | 0       | 0       | 0      | 0.0207 | 0.0171 | 0.0621  | 0.1404  |
|                                               | CCE                                     | 0.2529  | 0.0576 | 0.4545 | 0      | 0.369   | 1.7667  | 0.3483  | 0       | 0.8874  | 0       | 0       | 0       | 0      | 0      | 0      | 0.1098  | 0       |
|                                               | MD                                      | 0.1224  | 0      | 0      | 0.3429 | 0.9891  | 0.2286  | 0.2754  | 0       | 1.0674  | 0.0216  | 0       | 0       | 0      | 0.0135 | 0.0549 | 0       | 0       |
|                                               | VGR                                     | 1.3518  | 0.2097 | 0.1332 | 0.7785 | 15.9309 | 28.6947 | 22.3056 | 1.3779  | 27.0648 | 0.0018  | 0.0684  | 0       | 0      | 0.0018 | 0.1773 | 0.828   | 1.2411  |
|                                               | GRASS                                   | 5.4918  | 0.6957 | 0.5247 | 0.1719 | 7.4547  | 165.535 | 15.6564 | 1.7838  | 27.4311 | 0       | 0.1035  | 0.0117  | 0.0162 | 0.009  | 0.0585 | 1.5723  | 0.0594  |
|                                               | MF                                      | 9.9081  | 0.9963 | 0.3105 | 0.8379 | 12.8349 | 42.399  | 41.4657 | 2.3688  | 100.433 | 0.1701  | 3.1077  | 0.1791  | 0      | 0.0477 | 0.0504 | 1.5795  | 1.0134  |
|                                               | OBF                                     | 2.2635  | 0.1098 | 0.1422 | 0      | 2.2104  | 1.9692  | 8.244   | 22.7376 | 36.2295 | 0.072   | 0       | 0       | 0      | 0      | 0      | 0.4185  | 3.4065  |
|                                               | BLF                                     | 108.887 | 5.9805 | 1.3239 | 6.9669 | 41.8617 | 69.345  | 212.485 | 23.6709 | 2134.61 | 15.0183 | 25.884  | 1.2267  | 0.0234 | 0.1179 | 0.7434 | 8.9937  | 7.8048  |
|                                               | SFRV                                    | 5.3388  | 0.0063 | 0      | 0.0054 | 0.3789  | 0.1611  | 1.1736  | 0.036   | 68.5566 | 14.877  | 1.0179  | 0       | 0      | 0      | 0.0054 | 0.5553  | 2.0421  |
|                                               | MSF                                     | 1.6326  | 0      | 0.0009 | 0.1962 | 0.0378  | 0.0072  | 0.0216  | 0       | 49.8411 | 0.8802  | 81.4131 | 3.1941  | 0.2457 | 0      | 0      | 0       | 0.0504  |
|                                               | DPW                                     | 0.0063  | 0      | 0      | 0      | 0       | 0       | 0       | 0       | 1.6884  | 0       | 3.0789  | 17.8938 | 1.2717 | 0      | 0      | 0       | 0       |
|                                               | MTV                                     | 0.0513  | 0      | 0      | 0      | 0       | 0       | 0       | 0       | 0.0666  | 0       | 0.7173  | 2.367   | 5.1795 | 0      | 0      | 0       | 0       |
|                                               | TOWN                                    | 0.045   | 0.0045 | 0.0009 | 0      | 1.5696  | 0.6417  | 0.6381  | 0.0027  | 0.1953  | 0       | 0       | 0       | 0      | 2.025  | 0.1017 | 0.0333  | 0.0018  |
|                                               | ROAD                                    | 0.207   | 0      | 0.0756 | 0.0009 | 0.2043  | 0.0297  | 0.4527  | 0.0009  | 1.4382  | 0       | 0       | 0       | 0      | 0.0099 | 1.9512 | 0.2718  | 0.1188  |
|                                               | ROCK                                    | 0.387   | 0.0486 | 0.5634 | 0.0036 | 6.831   | 1.7064  | 9.8712  | 0.0693  | 2.8935  | 0.0072  | 0.0027  | 0       | 0      | 0.7434 | 1.0593 | 14.9274 | 1.1826  |
|                                               | WATER                                   | 0.0072  | 0      | 0      | 0      | 0.0153  | 0.0072  | 0.0522  | 0.0126  | 1.8558  | 0.5931  | 0.0009  | 0       | 0      | 0      | 0.0054 | 0.324   | 111.414 |

**Table S5** Area changes in different vegetation classes during 2010-2016 compared to 1999-2010. Green color gradient indicates upgrading process of vegetation succession. Red color gradient indicates degrading process of vegetation succession.

|                                               | 2010-2016 Total Area (km <sup>2</sup> ) |         |        |        |        |         |         |         |         |         |         |         |         |        |        |        |         |         |
|-----------------------------------------------|-----------------------------------------|---------|--------|--------|--------|---------|---------|---------|---------|---------|---------|---------|---------|--------|--------|--------|---------|---------|
|                                               | CLASS                                   | BURN    | CCTA   | CCE    | MD     | VGR     | GRASS   | MF      | OBF     | BLF     | SFRV    | MSF     | DPW     | MTV    | TOWN   | ROAD   | ROCK    | WATER   |
| 1999-2010<br>Total Area<br>(km <sup>2</sup> ) | BURN                                    | 1.5741  | 3.1644 | 0.7056 | 3.1167 | 13.8816 | 40.9257 | 18.5418 | 0.2961  | 50.6457 | 0.2178  | 0.8946  | 0.0072  | 0.0144 | 0.9306 | 0.4734 | 1.3941  | 0.1287  |
|                                               | CCTA                                    | 0.4293  | 0.0423 | 0.1998 | 0.7407 | 0.6291  | 1.6587  | 1.0746  | 0.0261  | 3.2418  | 0       | 0       | 0       | 0      | 0      | 0.0549 | 0.0351  | 0.0009  |
|                                               | CCE                                     | 0.0855  | 0      | 0.6102 | 0.0225 | 0.0063  | 0.495   | 0.5301  | 0.0324  | 1.6236  | 0       | 0.0216  | 0       | 0      | 0      | 0.1611 | 0.018   | 0       |
|                                               | MD                                      | 0.0171  | 0      | 0.063  | 0      | 5.769   | 1.4517  | 0.7101  | 0       | 1.6353  | 0.0063  | 0.4266  | 0       | 0      | 0.0045 | 0.0162 | 0.0045  | 0       |
|                                               | VGR                                     | 1.2447  | 0.027  | 0.72   | 3.2652 | 3.6819  | 18.7506 | 17.991  | 1.422   | 49.1004 | 0.009   | 0.036   | 0       | 0      | 0.279  | 0.2727 | 1.0341  | 0.1134  |
|                                               | GRASS                                   | 0.5427  | 3.0384 | 1.6668 | 2.3949 | 10.9485 | 216.296 | 36.4806 | 0.5967  | 41.7294 | 0.0027  | 0.0414  | 0       | 0      | 0.2637 | 0.4329 | 1.4157  | 0.2925  |
|                                               | MF                                      | 7.8813  | 0.0342 | 1.2555 | 8.7705 | 2.5983  | 24.3063 | 37.7244 | 5.8869  | 225.44  | 0.1746  | 0.2871  | 0       | 0      | 0.1512 | 0.8577 | 2.3004  | 0.3213  |
|                                               | OBF                                     | 3.2958  | 0      | 0.0801 | 0.3537 | 0.0027  | 0.6687  | 2.3517  | 15.6384 | 29.5704 | 0.0207  | 0       | 0       | 0      | 0      | 0.0405 | 0.0135  | 0.1377  |
|                                               | BLF                                     | 52.7517 | 0.1881 | 3.9762 | 30.969 | 12.6198 | 51.0975 | 98.775  | 14.769  | 2130.01 | 27.0972 | 34.6779 | 1.1691  | 0.0009 | 0.2952 | 3.1635 | 4.5486  | 2.6685  |
|                                               | SFRV                                    | 1.1511  | 0      | 0      | 0.0045 | 0.0162  | 0.0684  | 0.0072  | 0.0054  | 15.7005 | 13.3038 | 1.0008  | 0       | 0      | 0      | 0.0153 | 0.018   | 0.4365  |
|                                               | MSF                                     | 0.486   | 0      | 0      | 0      | 0.7344  | 0.423   | 0       | 0       | 33.0786 | 0.8559  | 76.9401 | 2.5776  | 0.3474 | 0      | 0.0009 | 0.0585  | 0       |
|                                               | DPW                                     | 0       | 0      | 0      | 0      | 0.0009  | 0.0288  | 0       | 0       | 2.3616  | 0       | 5.1831  | 15.7635 | 1.5048 | 0      | 0      | 0.0297  | 0       |
|                                               | MTV                                     | 0       | 0      | 0      | 0      | 0.0189  | 0.0342  | 0       | 0       | 0.0027  | 0       | 0.3474  | 1.2429  | 5.0742 | 0      | 0      | 0.0162  | 0       |
|                                               | TOWN                                    | 0       | 0.0153 | 0      | 0.0036 | 0.0882  | 0.4734  | 0.0099  | 0       | 0.2826  | 0       | 0       | 0       | 0      | 1.773  | 0.0873 | 0.2556  | 0       |
|                                               | ROAD                                    | 0       | 0.0126 | 0.0405 | 0.0117 | 0       | 0.3717  | 0.4122  | 0.0036  | 1.287   | 0       | 0       | 0       | 0      | 0.0135 | 1.8405 | 0.144   | 0.0882  |
|                                               | ROCK                                    | 0.0378  | 0.0657 | 0.1647 | 0.0306 | 0.2601  | 4.1427  | 1.0809  | 0.144   | 8.0064  | 0.045   | 0       | 0       | 0      | 0.8262 | 0.4779 | 12.8556 | 1.6398  |
|                                               | WATER                                   | 0.1278  | 0.0045 | 0.0369 | 0.0504 | 0.0324  | 1.5831  | 0.1755  | 0.2511  | 5.7564  | 1.7397  | 0.0225  | 0       | 0      | 0.0441 | 0.2484 | 0.1728  | 118.429 |

**Table S6** The change matrix of successional stages of class cover area (km<sup>2</sup>) in different periods and different zones of the Reserve.

| 1988-1999<br>Inside | 1999-2010 Inside |         |        |        |         |        |          |          | 2010-2016 Inside    |       |        |        |         |         |        |          |          |
|---------------------|------------------|---------|--------|--------|---------|--------|----------|----------|---------------------|-------|--------|--------|---------|---------|--------|----------|----------|
|                     |                  | BURN    | VGR    | GRASS  | MF      | OBF    | BLF      | Total    | 1999-2010<br>Inside |       | BURN   | VGR    | GRASS   | MF      | OBF    | BLF      | Total    |
|                     | BURN             | 0       | 0.6147 | 0.0144 | 0.0981  | 0      | 1.5354   | 2.2626   |                     | BURN  | 0.0153 | 6.8742 | 12.6018 | 7.5231  | 0.1062 | 25.4916  | 52.6122  |
|                     | VGR              | 0.1521  | 0.8955 | 0.6687 | 1.3356  | 0.1341 | 3.3102   | 6.4962   |                     | VGR   | 0.0189 | 0.1836 | 1.1826  | 1.3401  | 0.009  | 7.164    | 9.8982   |
|                     | GRASS            | 0.4275  | 0.3186 | 0.639  | 0.6264  | 0.1305 | 1.3401   | 3.4821   |                     | GRASS | 0.0054 | 0.0081 | 2.8089  | 1.098   | 0.0639 | 2.106    | 6.0903   |
|                     | MF               | 0.9063  | 1.1862 | 0.7506 | 3.2112  | 0.2934 | 11.6217  | 17.9694  |                     | MF    | 0      | 0.0909 | 1.3518  | 2.8458  | 0.6372 | 30.9636  | 35.8893  |
|                     | OBF              | 0.9171  | 0.2763 | 0.1485 | 1.1376  | 3.9978 | 6.9138   | 13.3911  |                     | OBF   | 0      | 0      | 0.0396  | 0.3249  | 3.2994 | 4.9284   | 8.5923   |
|                     | BLF              | 47.2599 | 6.2649 | 4.2039 | 29.3067 | 4.0581 | 648.4518 | 739.5453 |                     | BLF   | 3.9078 | 4.6998 | 6.0525  | 14.3442 | 2.4588 | 665.5131 | 696.9762 |

| 1988-1999<br>Buffer | 1999-2010 Buffer |        |        |        |         |        |         |          | 1999-2010<br>Buffer | 2010-2016 Buffer |        |        |        |        |        |          |          |
|---------------------|------------------|--------|--------|--------|---------|--------|---------|----------|---------------------|------------------|--------|--------|--------|--------|--------|----------|----------|
|                     |                  | BURN   | VGR    | GRASS  | MF      | OBF    | BLF     | Total    |                     |                  | BURN   | VGR    | GRASS  | MF     | OBF    | BLF      | Total    |
|                     | BURN             | 0      | 0.0828 | 0      | 0.0027  | 0      | 0.1422  | 0.2277   |                     | BURN             | 0.0009 | 0.2925 | 1.5273 | 0.9981 | 0.0531 | 2.4048   | 5.2767   |
|                     | VGR              | 0.1386 | 1.9062 | 1.2942 | 2.3553  | 0.0405 | 2.376   | 8.1108   |                     | VGR              | 0      | 0.0054 | 1.2735 | 1.7973 | 0.1692 | 4.4163   | 7.6617   |
|                     | GRASS            | 0.1539 | 0.2889 | 3.0375 | 1.2042  | 0.0126 | 1.5048  | 6.2019   |                     | GRASS            | 0.0216 | 0.4185 | 4.7646 | 1.8234 | 0.0972 | 2.1429   | 9.2682   |
|                     | MF               | 0.0882 | 0.9531 | 1.4481 | 3.2409  | 0.2961 | 6.5565  | 12.5829  |                     | MF               | 0.0999 | 0.0234 | 0.7029 | 3.852  | 1.5759 | 23.0715  | 29.3256  |
|                     | OBF              | 0.2763 | 0.5598 | 0.0378 | 0.9828  | 3.1032 | 3.2805  | 8.2404   |                     | OBF              | 0.0216 | 0      | 0.0828 | 0.3942 | 3.4254 | 3.0042   | 6.9282   |
|                     | BLF              | 4.6467 | 3.7332 | 3.6207 | 21.8178 | 3.5451 | 144.639 | 182.0025 |                     | BLF              | 0.5688 | 0.1251 | 2.5506 | 9.351  | 2.8863 | 146.0259 | 161.5077 |

| 1988-1999<br>Outside | 1999-2010 Outside |         |         |          |          |         |          |          | 1999-2010<br>Outside | 2010-2016 Outside |         |         |          |         |        |          |          |
|----------------------|-------------------|---------|---------|----------|----------|---------|----------|----------|----------------------|-------------------|---------|---------|----------|---------|--------|----------|----------|
|                      |                   | BURN    | VGR     | GRASS    | MF       | OBF     | BLF      | Total    |                      |                   | BURN    | VGR     | GRASS    | MF      | OBF    | BLF      | Total    |
|                      | BURN              | 0.1062  | 1.6722  | 1.2726   | 2.1447   | 0.0099  | 4.8573   | 10.0629  |                      | BURN              | 1.5579  | 6.7149  | 26.7966  | 10.0206 | 0.1368 | 22.7493  | 67.9761  |
|                      | VGR               | 1.0611  | 13.1292 | 26.7318  | 18.6147  | 1.2033  | 21.3786  | 82.1187  |                      | VGR               | 1.2258  | 3.4929  | 16.2945  | 14.8536 | 1.2438 | 37.5201  | 74.6307  |
|                      | GRASS             | 4.9104  | 6.8472  | 161.8587 | 13.8258  | 1.6407  | 24.5862  | 213.669  |                      | GRASS             | 0.5157  | 10.5219 | 208.7226 | 33.5592 | 0.4356 | 37.4805  | 291.2355 |
|                      | MF                | 8.9136  | 10.6956 | 40.2003  | 35.0136  | 1.7793  | 82.2546  | 178.857  |                      | MF                | 7.7814  | 2.484   | 22.2516  | 31.0266 | 3.6738 | 171.405  | 238.6224 |
|                      | OBF               | 1.0701  | 1.3743  | 1.7829   | 6.1236   | 15.6366 | 26.0352  | 52.0227  |                      | OBF               | 3.2742  | 0.0027  | 0.5463   | 1.6326  | 8.9136 | 21.6378  | 36.0072  |
|                      | BLF               | 56.9799 | 31.8636 | 61.5204  | 161.3601 | 16.0677 | 1341.517 | 1669.308 |                      | BLF               | 48.2751 | 7.7949  | 42.4944  | 75.0798 | 9.4239 | 1318.469 | 1501.537 |

| CLASS | Landsat Image                                                                       | Classification Layer                                                                | High-resolution Image                                                                | Field Photograph                                                                      |
|-------|-------------------------------------------------------------------------------------|-------------------------------------------------------------------------------------|--------------------------------------------------------------------------------------|---------------------------------------------------------------------------------------|
| BURN  | 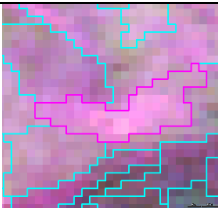   |    |    |    |
| CCTA  |    |    |    |    |
| CCE   |    |    |    |    |
| MD    |   |   |   |   |
| VGR   |  |  |  |  |
| GRASS |  |  |  |  |
| MF    |  |  |  |  |
| OBF   |  |  |  |  |

Figure S1 continued

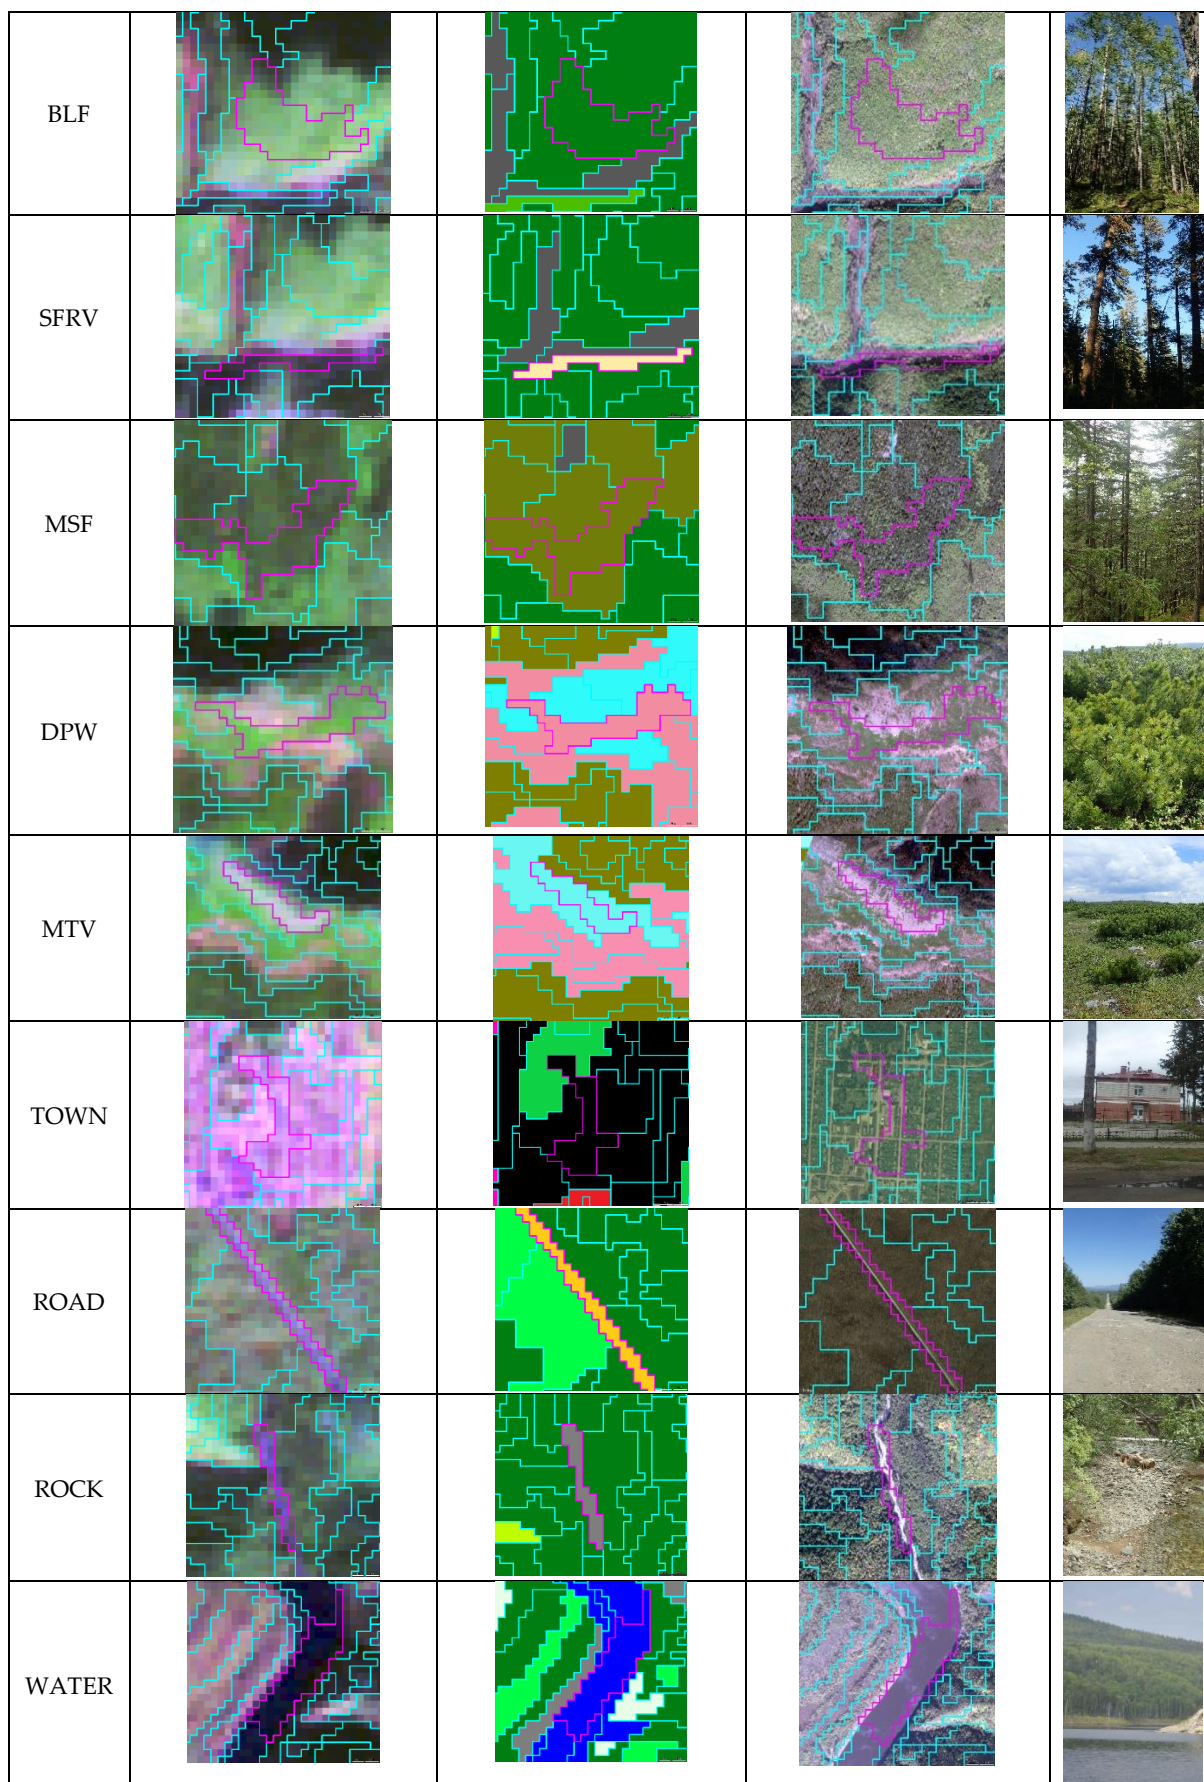

**Figure S1** Examples of comparison of Landsat image data, classification result, and reference data (high-resolution image and field photographs) for 17 classes.

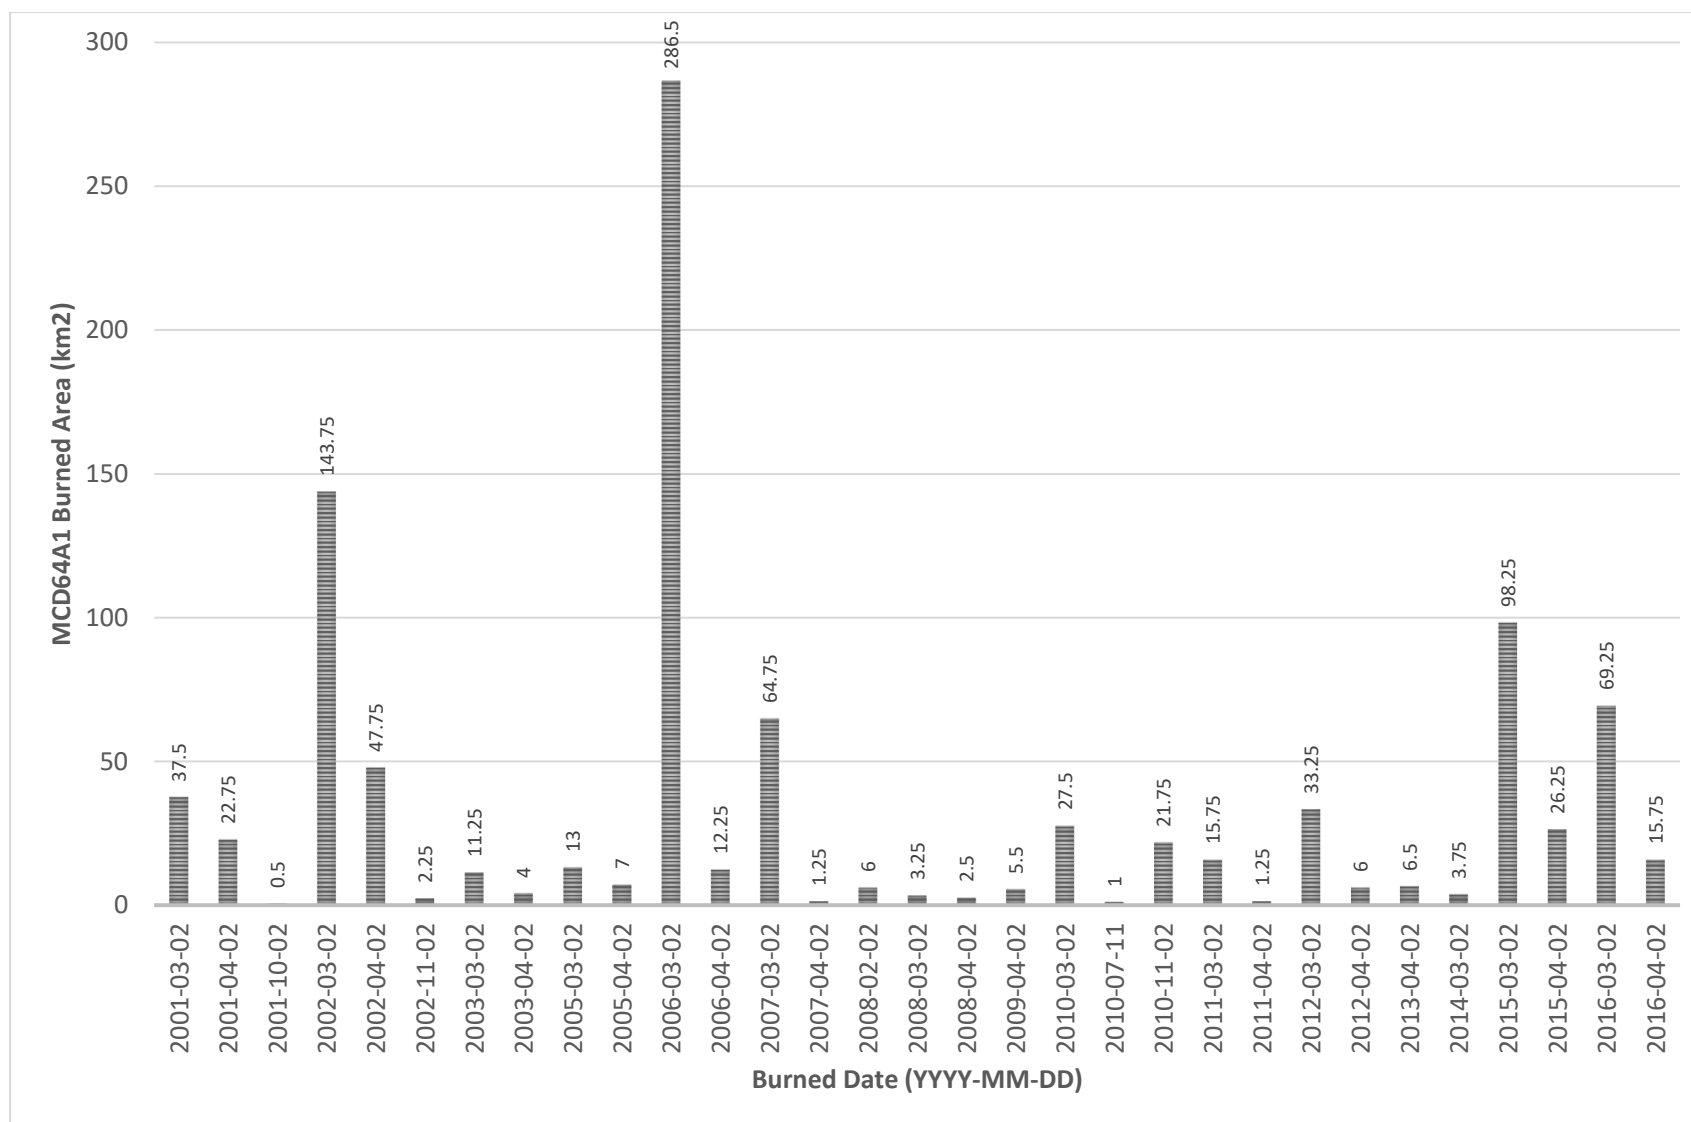

**Figure S2** The Reserve burned area in each date registered by the MCD64A1 product.

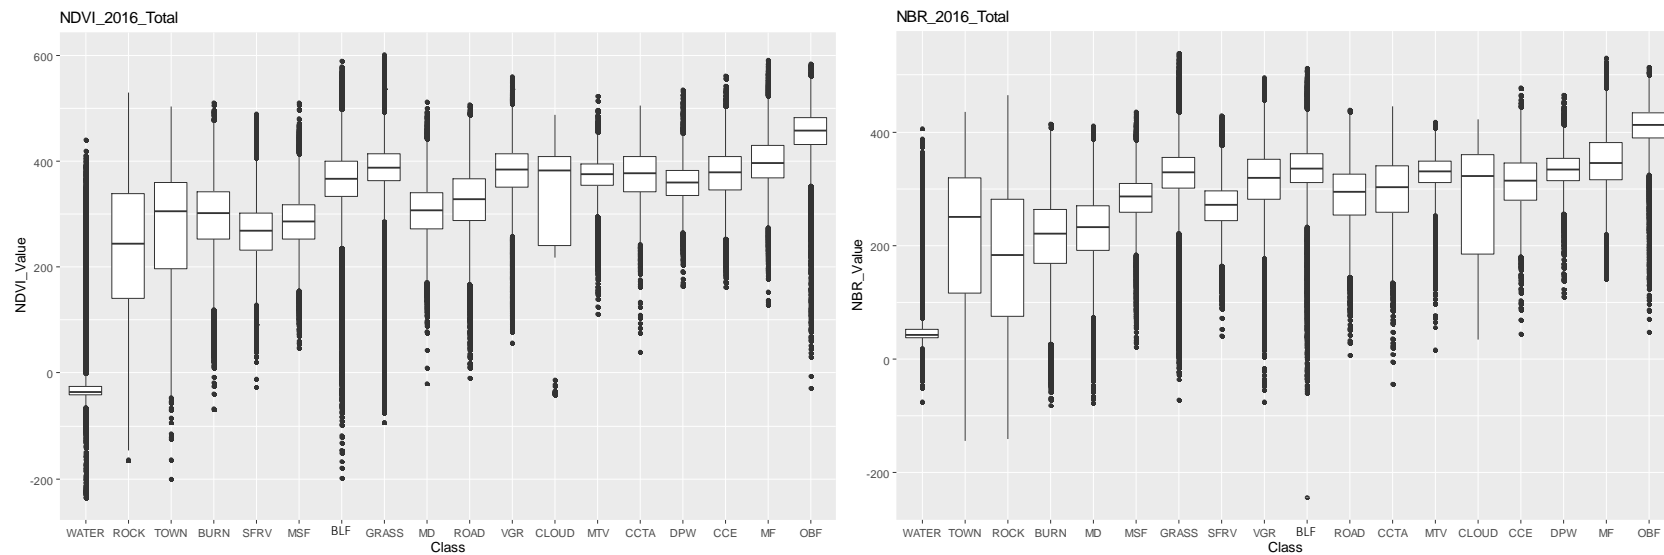

**Figure S3** Box plot of (a) normalized difference vegetation index (NDVI) and (b) normalized burn ratio index (NBR) values in total area of the Reserve for each class in 2016. Middle line in box represents the median; lower box bounds the first quartile; upper box bounds the 3rd quartile. Whiskers represent the 95% confidence interval of the mean.

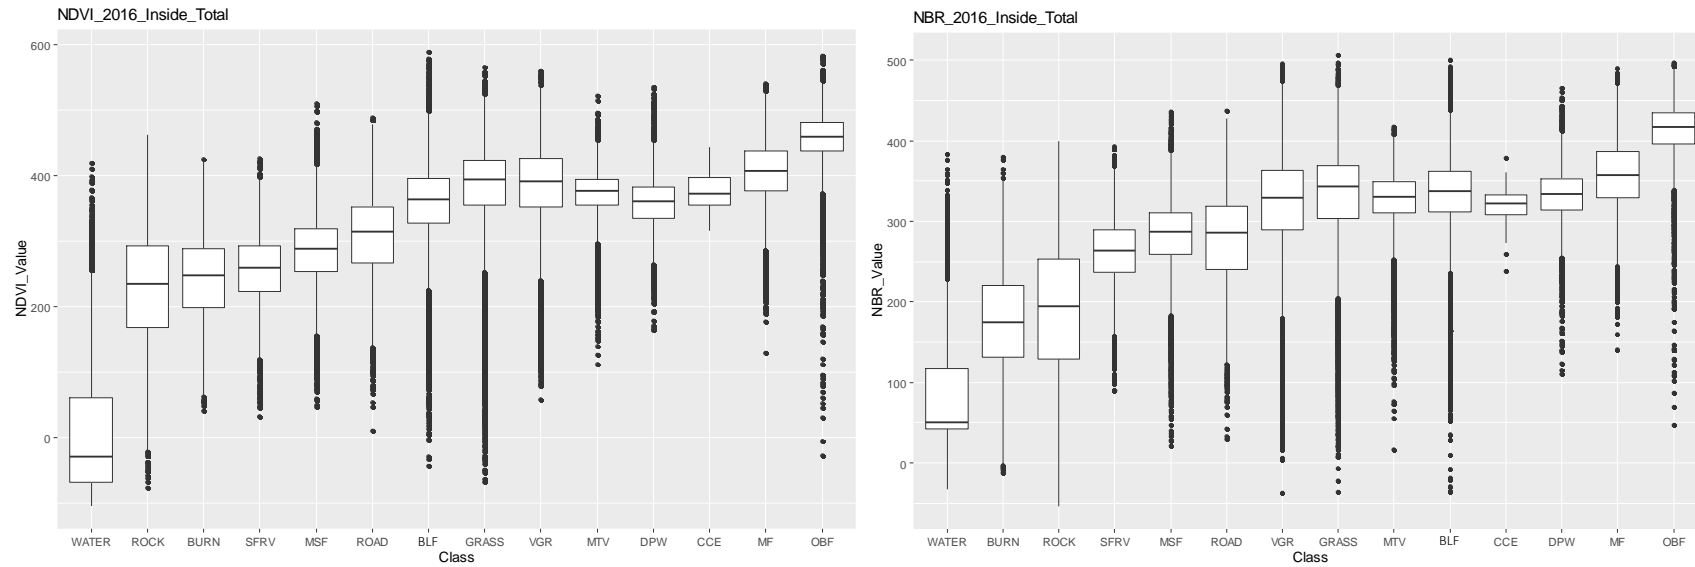

**Figure S4** Box plot of (a) normalized difference vegetation index (NDVI) and (b) normalized burn ratio index (NBR) values in inside area of the Reserve for each class in 2016. Middle line in box represents the median; lower box bounds the first quartile; upper box bounds the 3rd quartile. Whiskers represent the 95% confidence interval of the mean.

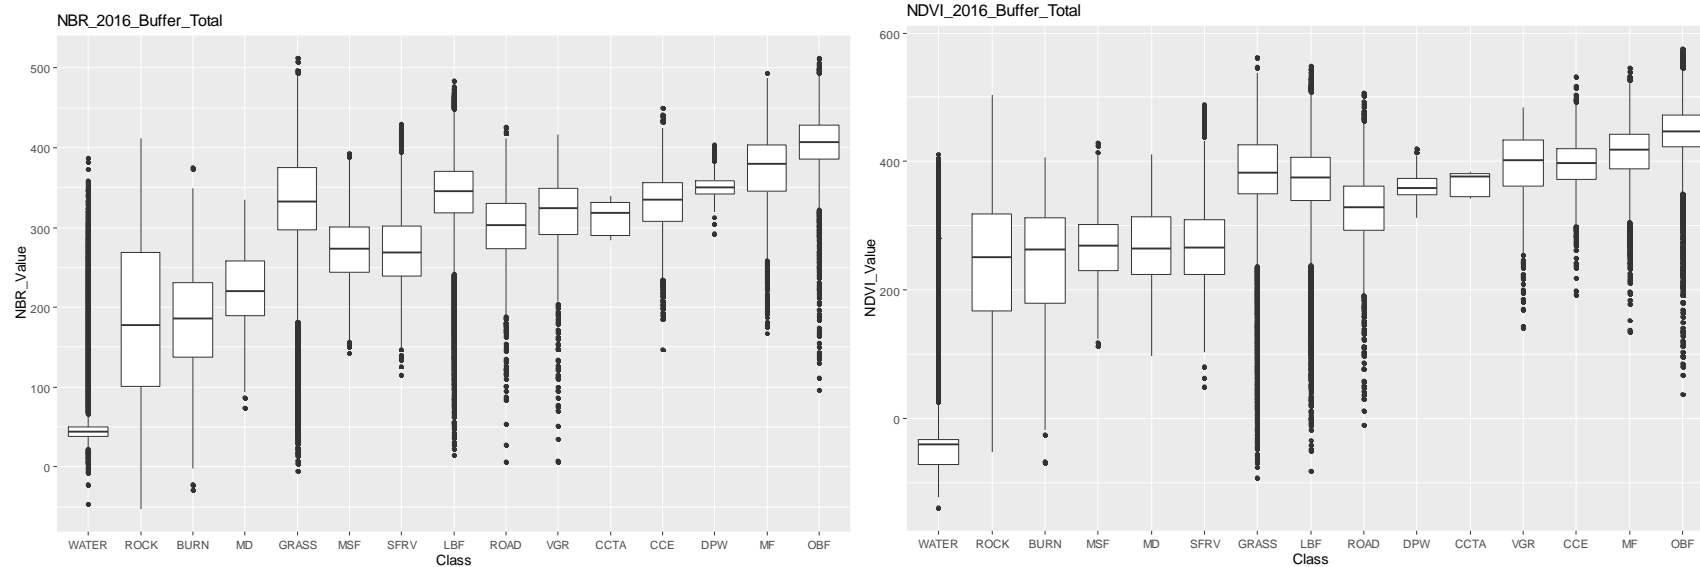

**Figure S5** Box plot of (a) normalized difference vegetation index (NDVI) and (b) normalized burn ratio index (NBR) values in buffer zone area of the Reserve for each class in 20<sub>BLF</sub>15. Middle line in box represents the median; lower box bounds the first quartile; upper box bounds the 3rd quartile. Whiskers represent the 95% confidence interval of the mean.

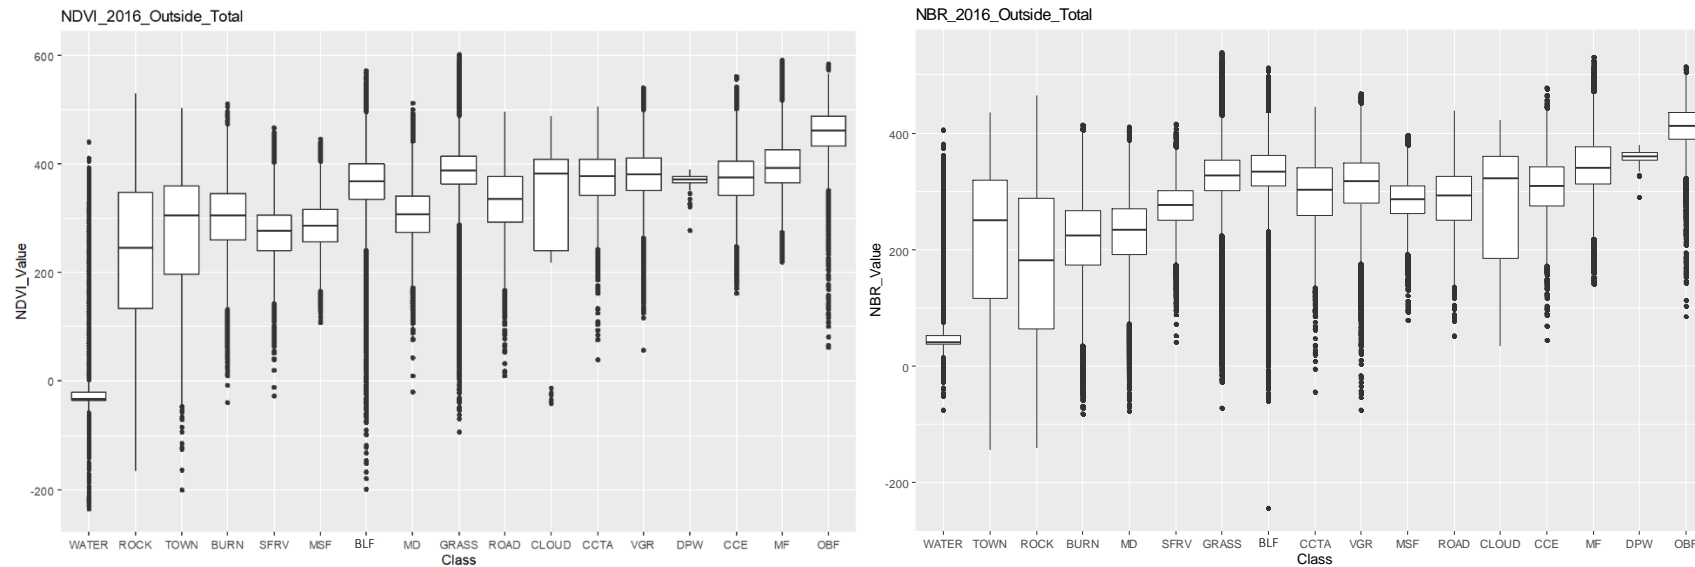

**Figure S6** Box plot of (a) normalized difference vegetation index (NDVI) and (b) normalized burn ratio index (NBR) in outside area of the Reserve for each class in 2016. Middle line in box represents the median; lower box bounds the first quartile; upper box bounds the 3rd quartile. Whiskers represent the 95% confidence interval of the mean.
